# Supplementary material for: Lysosomal cathepsins act in concert with Gasdermin-D during NAIP/NLRC4-dependent IL-1β secretion
Source: PubMed Central journal article supplement (PMC9731969; doi:10.1038/s41419-022-05476-3), 2022-12-08
Supplement: 41419_2022_5476_MOESM6_ESM.pdf [file 41419_2022_5476_MOESM6_ESM.pdf]

Figure 1B

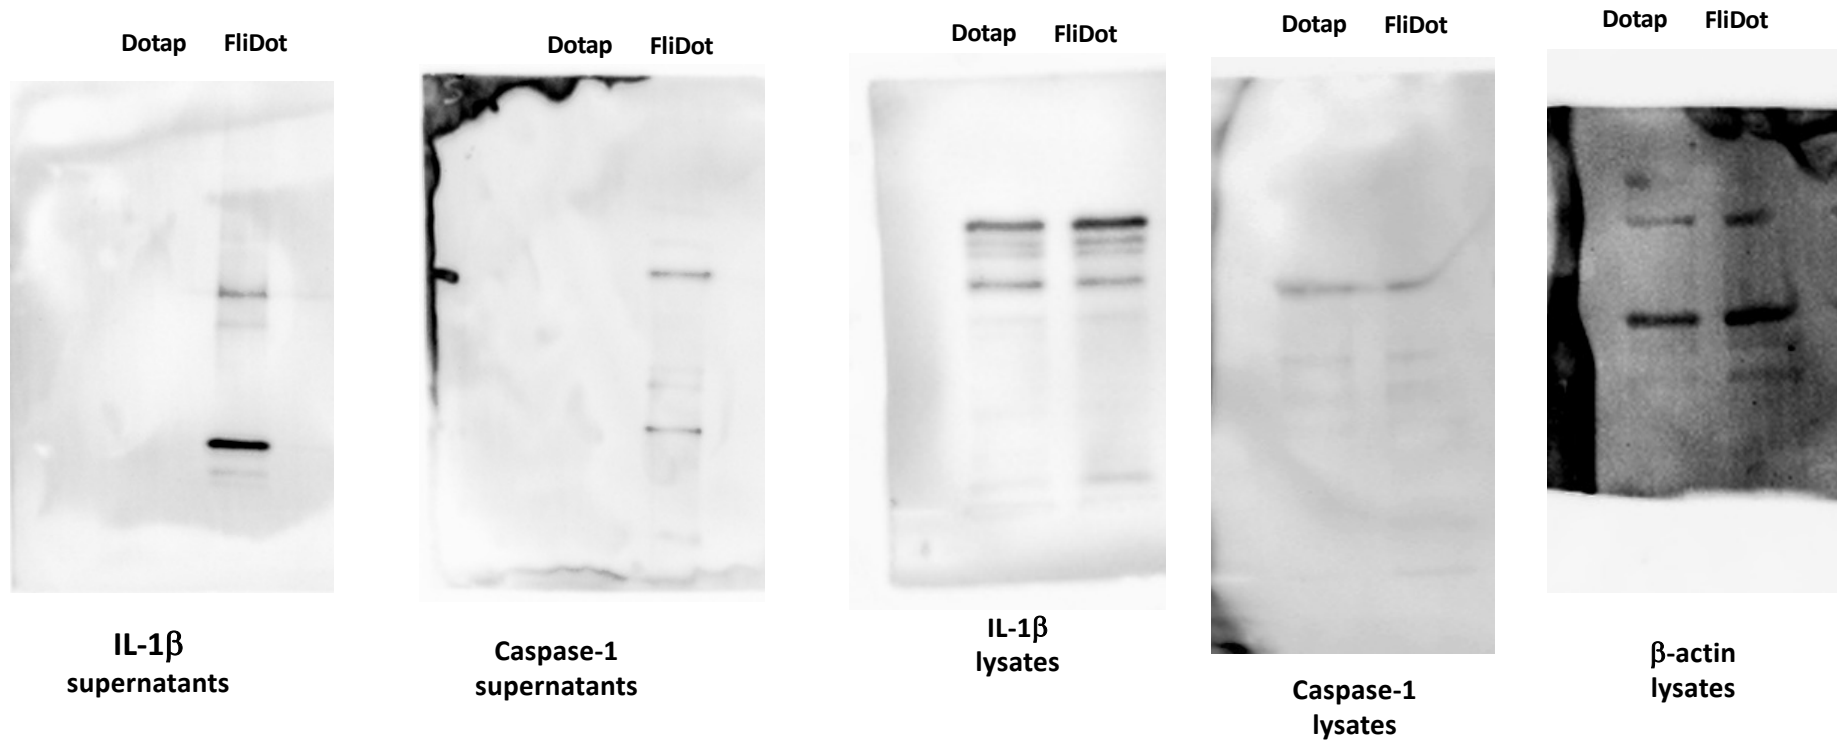

Figure 3A

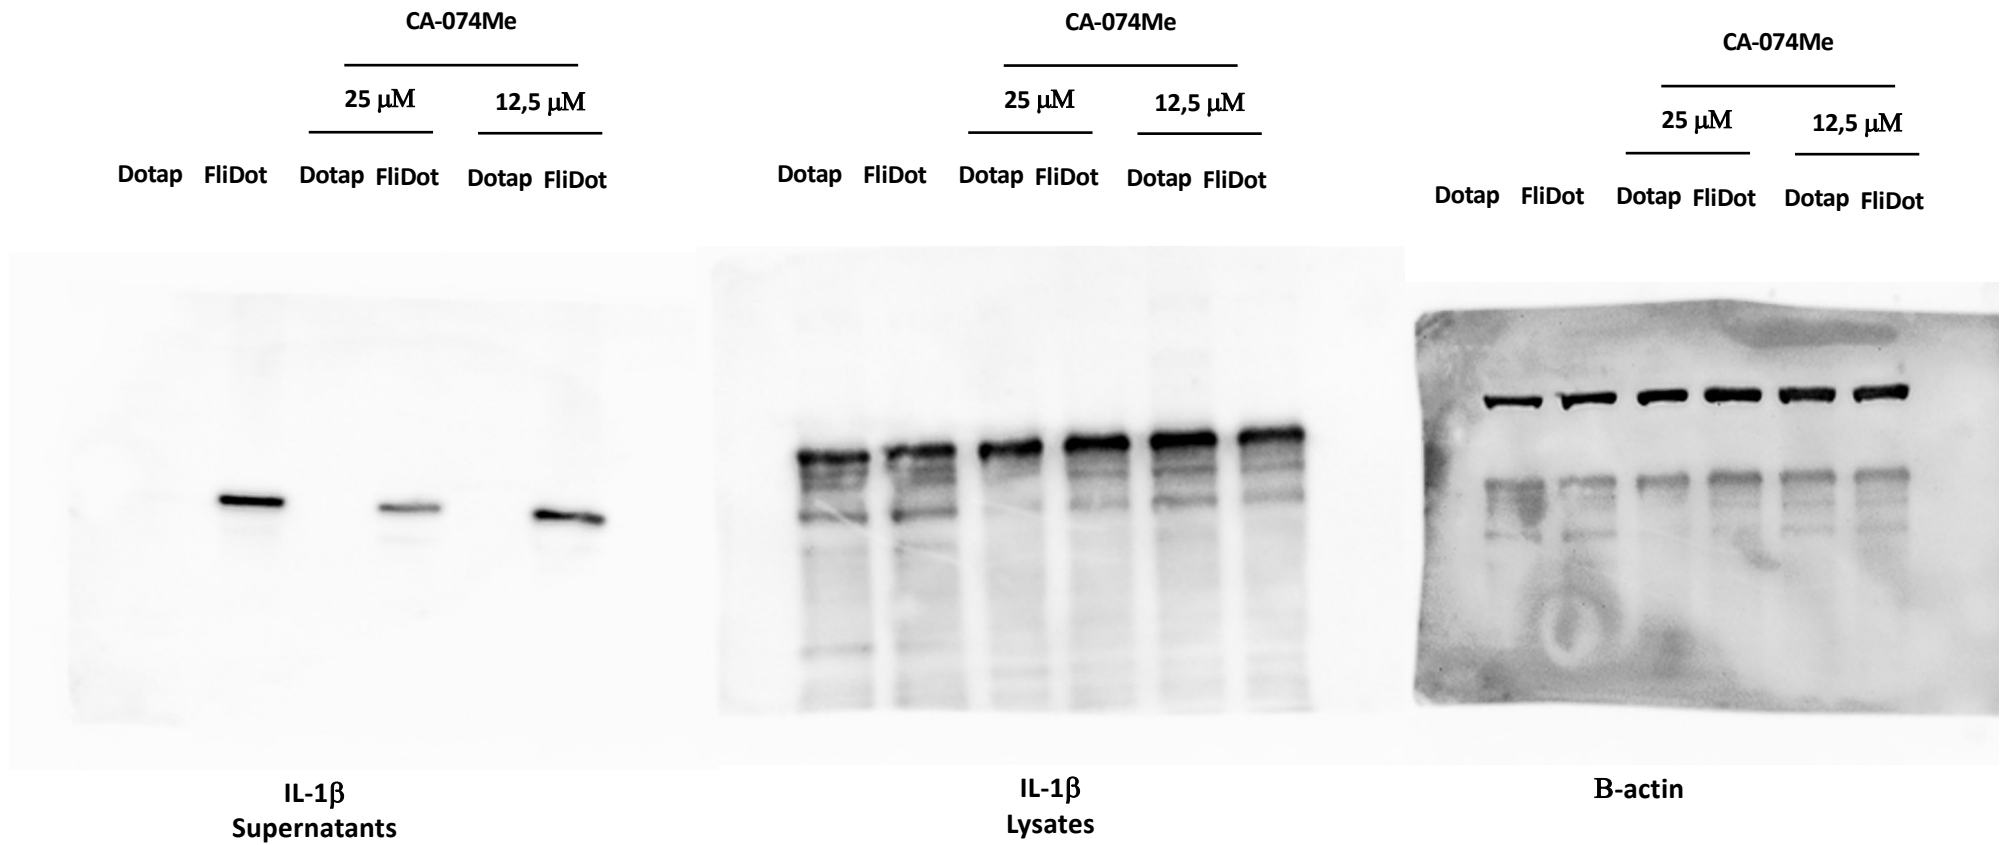

Figure 3C

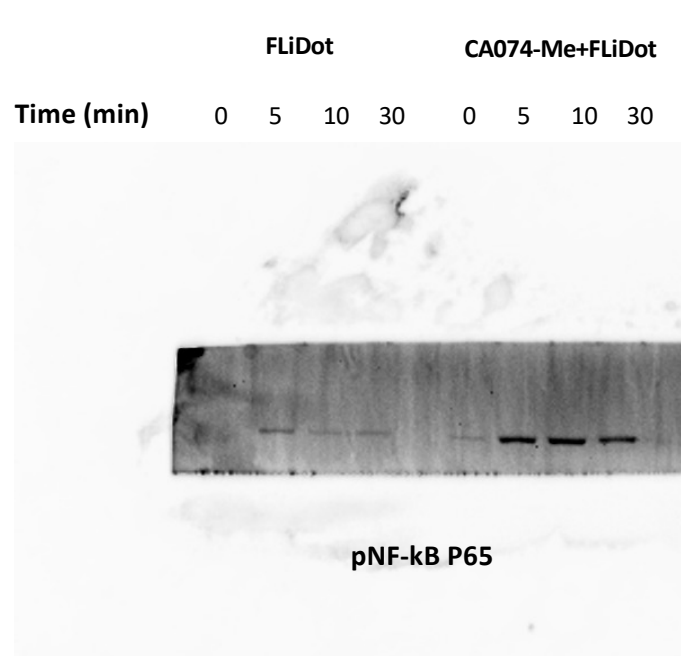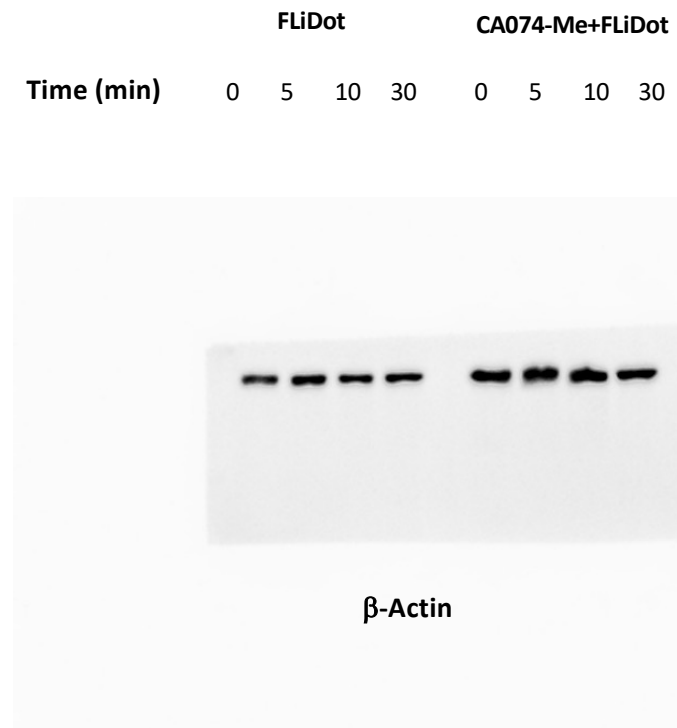

**SUPPLEMENTAL Fig 1B**

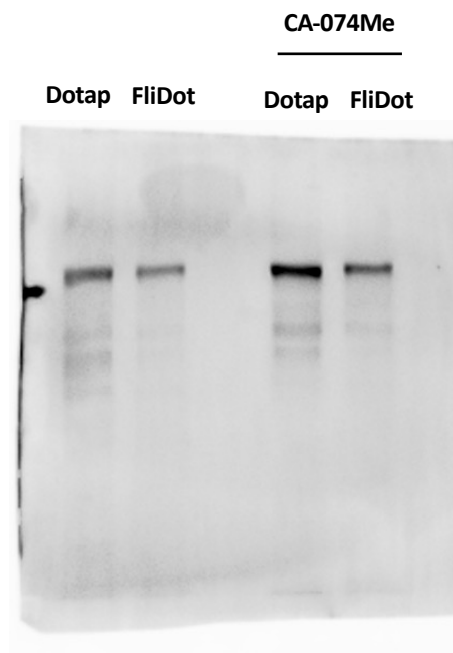

**Caspase-1 Lysates**
